# Supplementary material
Source: PubMed Central journal article supplement (PMC6024190)

# Supplementary Figure S1

HE

Before cut

After cut

49T  
(HG-PanIN)

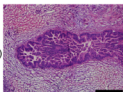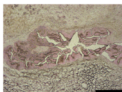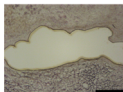

49T  
(LG-PanIN)

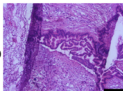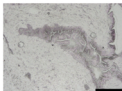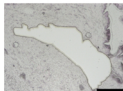

39T  
(HG-PanIN)

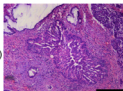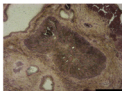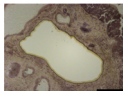

70T  
(HG-PanIN)

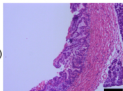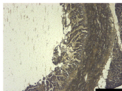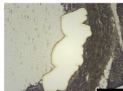

69T  
(HG-PanIN)

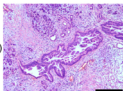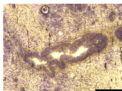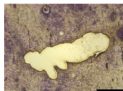

Supplement: mmc1.pdf [file mmc1.pdf]

# Supplementary Figure S2

## Normal Pancreas tissue

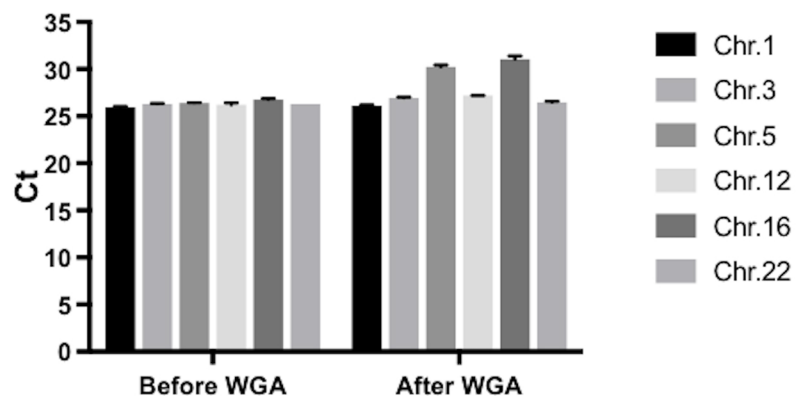

## MIA PaCa-2

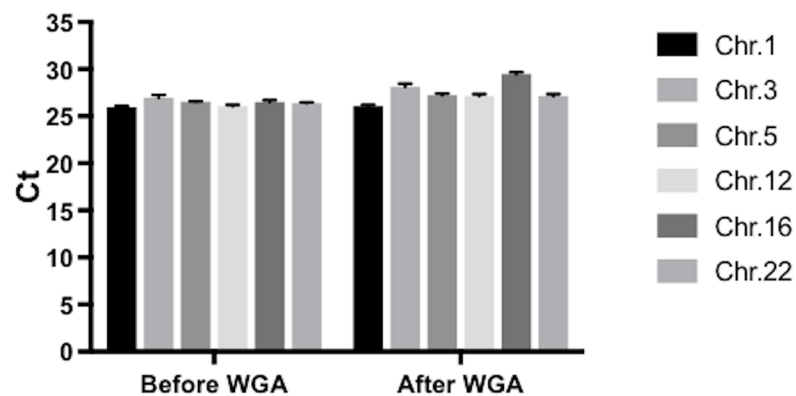

## HPDE

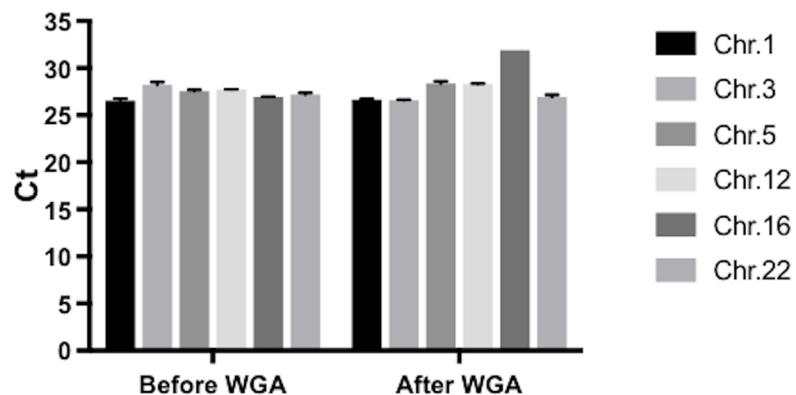

## HPNE

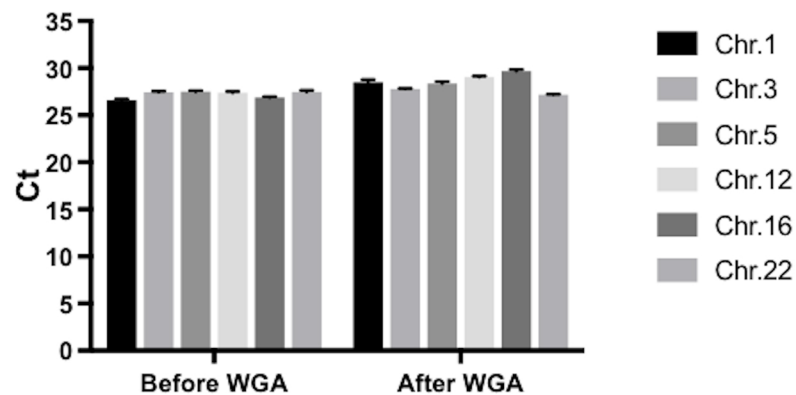

Supplement: mmc2.pdf [file mmc2.pdf]

# Supplementary Figure S3

GC-corrected LRR

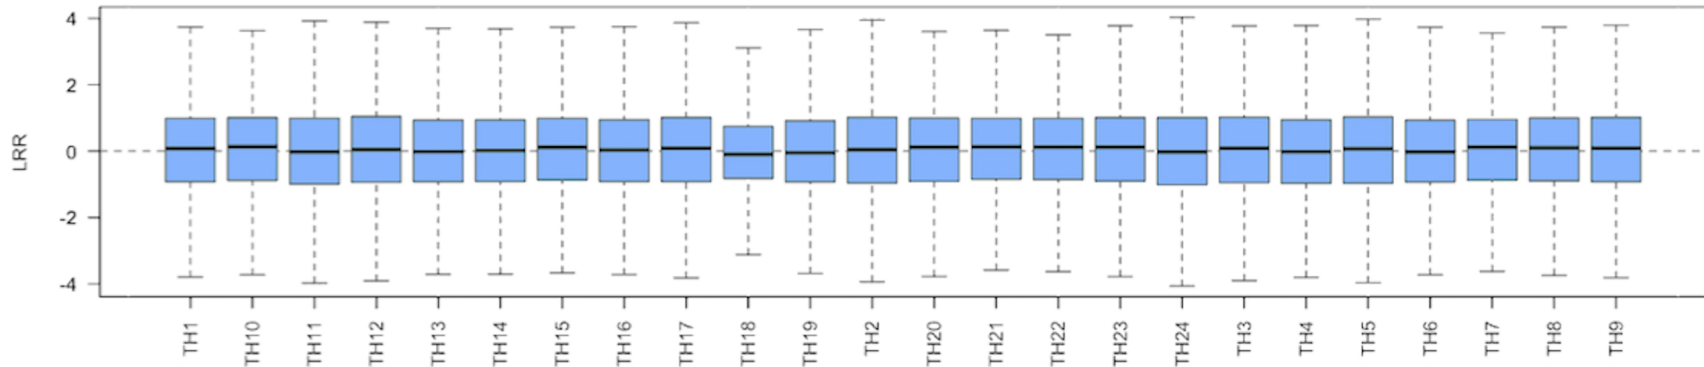

Supplement: mmc3.pdf [file mmc3.pdf]

# Supplementary Figure S4

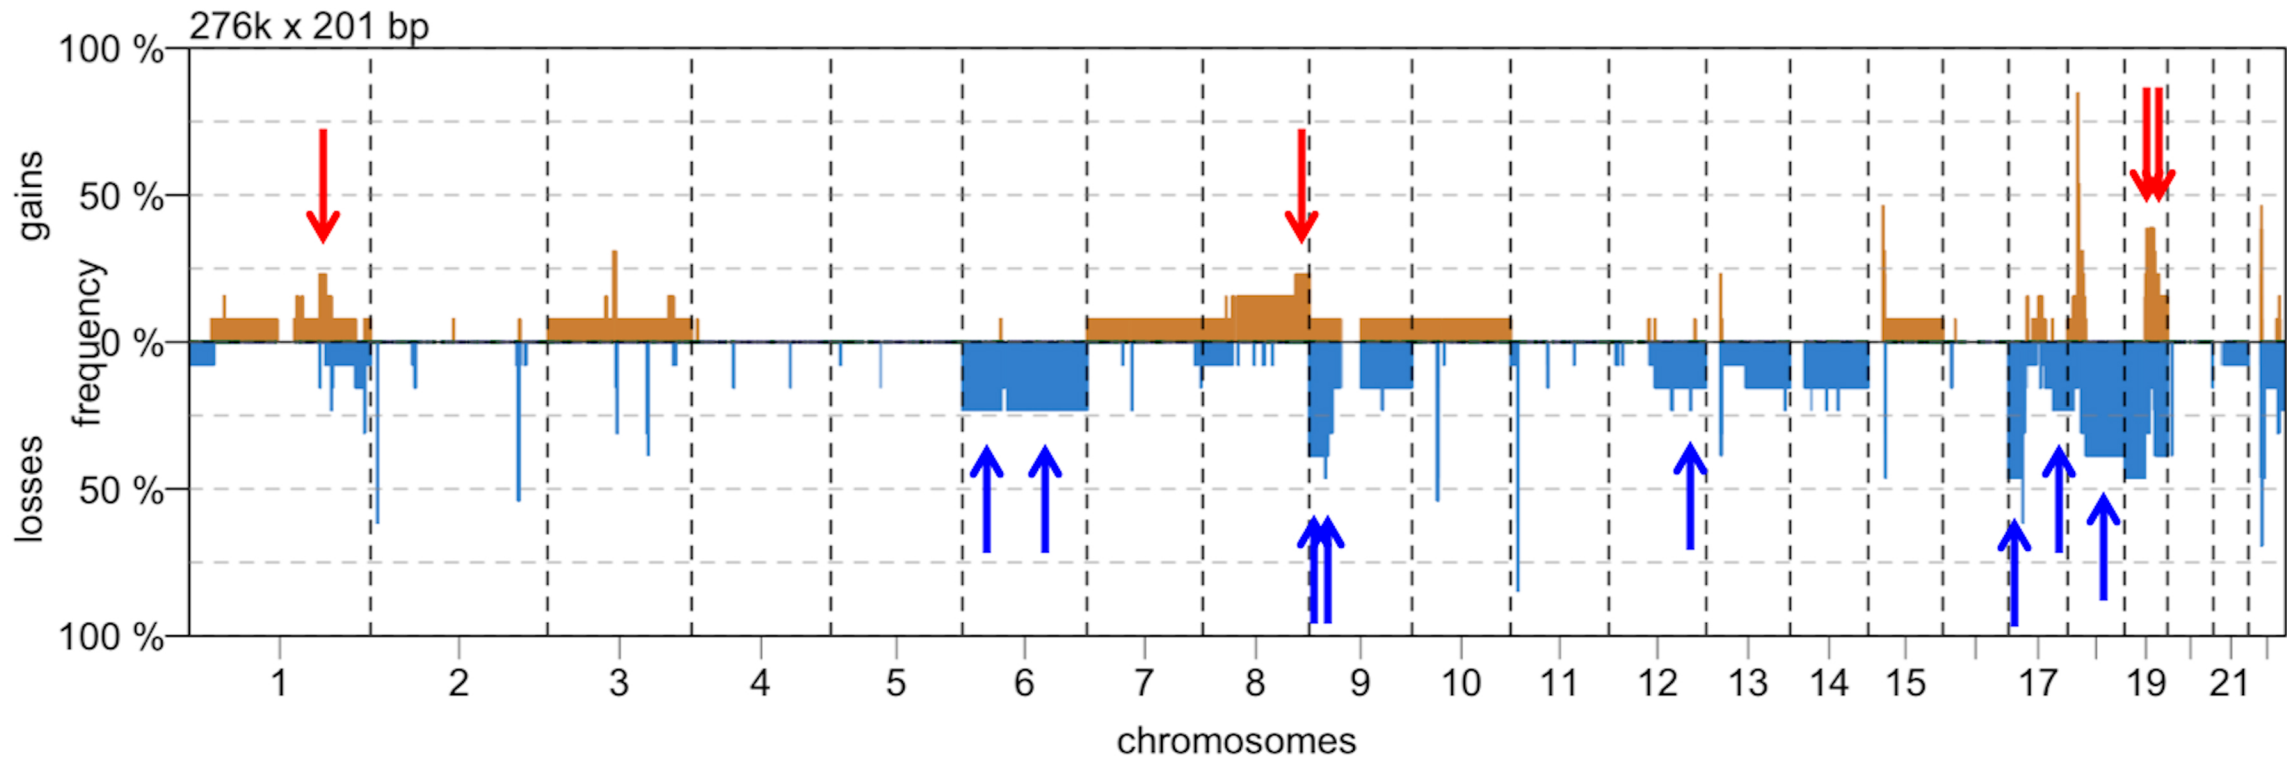

Supplement: mmc4.pdf [file mmc4.pdf]
